# Supplementary material
Source: PubMed Central journal article supplement (PMC8168823)
Supplement: noaa297_suppl_supplementary_figure_1.pdf [file noaa297_suppl_supplementary_figure_1.pdf]

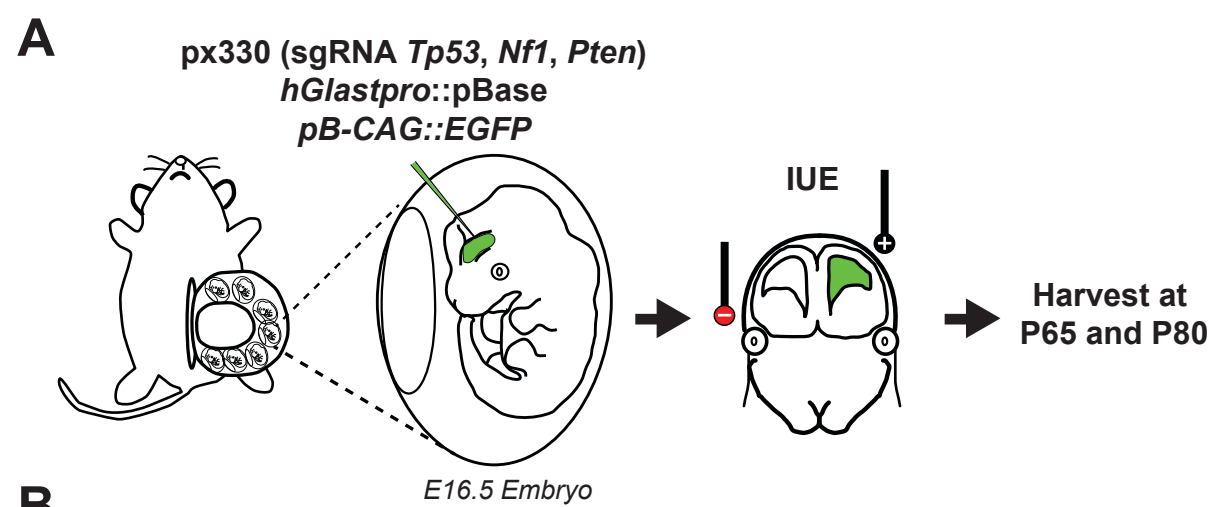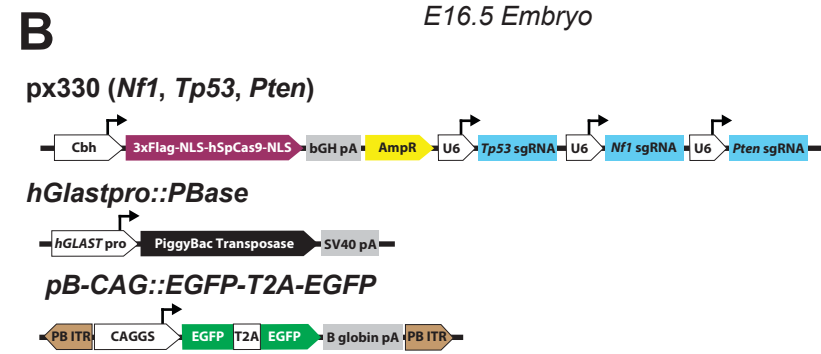

**C**

### Murine TDEC *Nf1*

| WT | CTGTCCTTCAACAAC TCCCTCGATG TGGCGGCTCATCTGCCCTATCTCTT  | 997164 (32.05%)  |
|----|-------------------------------------------------------|------------------|
| 1  | CTGTCCTTCAACAAC TCCCTGATG-TGGCGGCTCATCTGCCCTATCTCTT   | 1017731 (32.71%) |
| 2  | CTGTCCTTCAACAAC TCCCTCGAATG TGGCGGCTCATCTGCCCTATCTCTT | 929982 (29.89%)  |
| 3  | CTGTCCTTCAACAAC TCCCTCGTG-TGGCGGCTCATCTGCCCTATCTCTT   | 66465 (02.13%)   |
| 4  | CTGTCCTTCATG-----TGGCGGCTCATCTGCCCTATCTCTT            | 10433 (00.33%)   |
| 5  | CTGTCCTTCAACAAC TCCCTC-----ATCTGCCCTATCTCTT           | 9212 (00.29%)    |

### Murine TDEC *Pten*

| WT | CATCATCAAAGAGATCGTTAGCAGAAACAAAAGGAGATATCAAGAGGATG | 398178 (39.73%) |
|----|----------------------------------------------------|-----------------|
| 1  | CATCATCAAAGAGATCGTTAGCAGAAACAAAAGGAGATATCAAGAGGATG | 280005 (56.50%) |
| 2  | CATCATCAAAGAGATCGTTAGCAGAAA----AGGAGATATCAAGAGGATG | 7693 (01.09%)   |
| 3  | CATCATCAAAGAGATCGTTAGCAGAAA----AGGAGATATCAAGAGGATG | 6711 (00.95%)   |
| 4  | CATCATCAAAGAGATCGTTAGCAGAAACAAAAGGAGATATCAAGAGGATG | 202 (00.03%)    |
| 5  | CATCATCAAAGAGATCGTTAGCAGAAA----GAGATATCAAGAGGATG   | 187 (00.02%)    |

### Murine TDEC *Tp53*

| WT | TCGGATATCAGCCTCGAGCTCCCTCTGAGCCAGGAGACATTTTCAGGCTT  | 1531636 (38.72) |
|----|-----------------------------------------------------|-----------------|
| 1  | TCGGATATCAGCCTCGAGCTCCCTCTGAGCCAGGAGACATTTTCAGGCTT  | 1019194 (58.17) |
| 2  | TCGGATATCAGCCTCGAGCTCCCTCA--GCCAGGAGACATTTTCAGGCTT  | 19917 (00.75%)  |
| 3  | TCGGATATCAGCCTCGAGCTCCCTCTG--GCCAGGAGACATTTTCAGGCTT | 13882 (00.52%)  |
| 4  | TCGGATATCAGCCTCGAGCTCCCTCTG----AGGAGACATTTTCAGGCTT  | 4986 (00.18%)   |
| 5  | TCGGATATCAGCCTCGAGCTCCCTCTGAGCCAGGAGACATTTTCAGGCTT  | 3926 (00.14%)   |
