# Supplementary material
Source: PubMed Central journal article supplement (PMC8168823)

**A**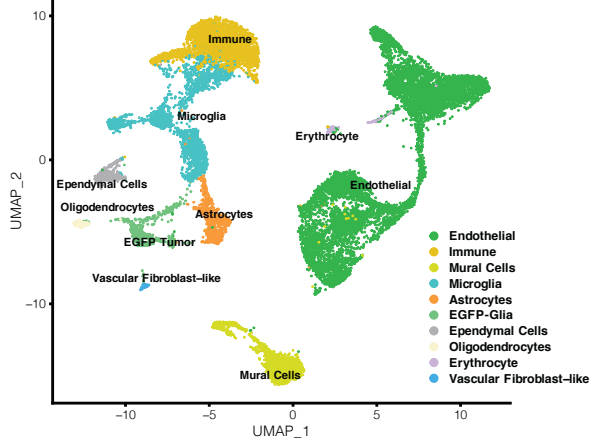**B**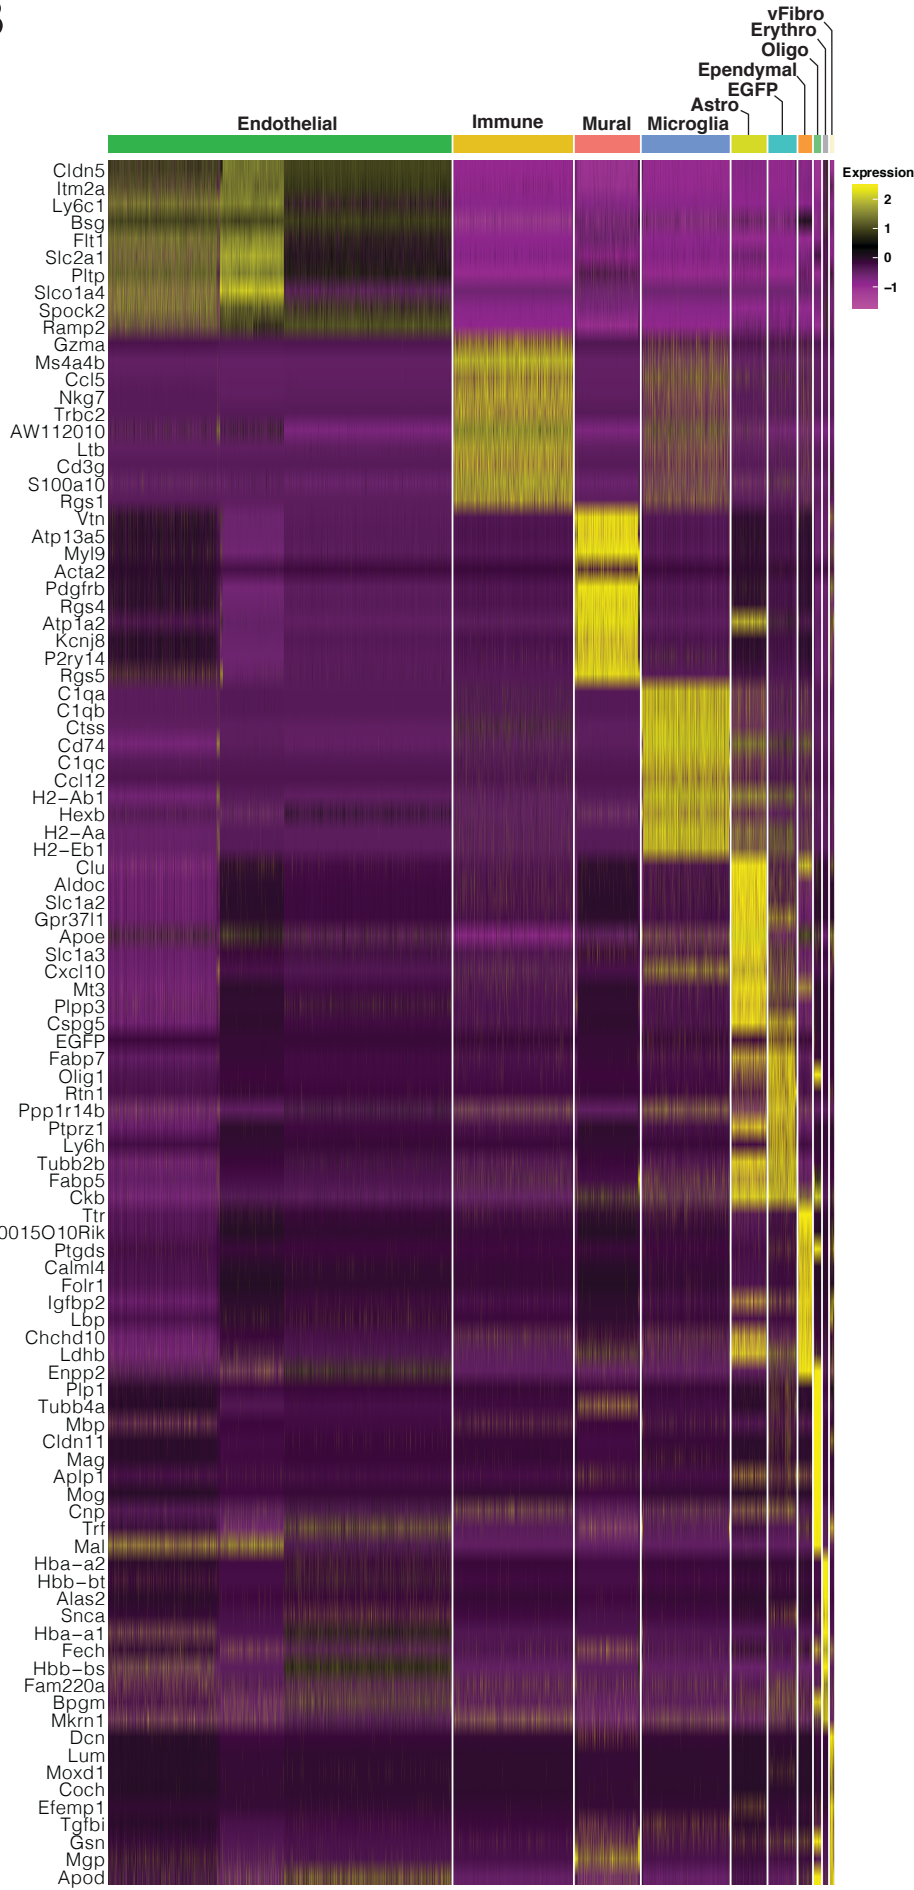**C**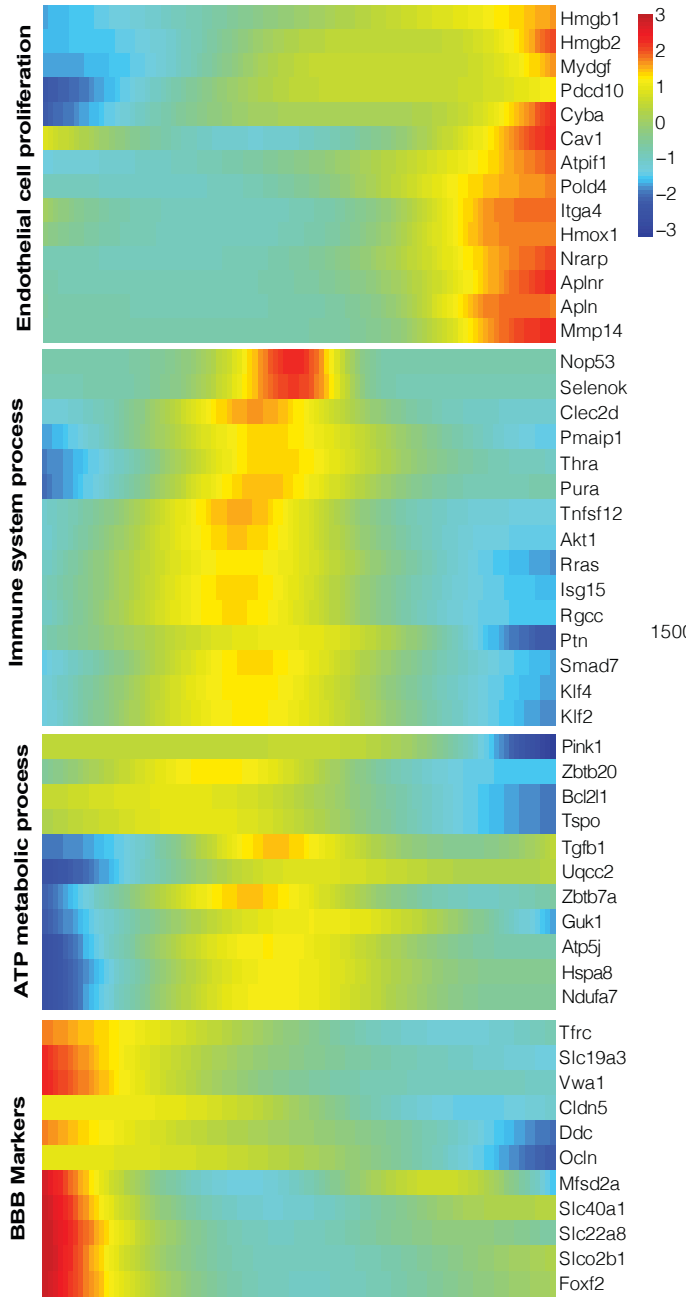**Figure 4**

Supplement: noaa297_suppl_supplementary_figure_2.pdf [file noaa297_suppl_supplementary_figure_2.pdf]

**A**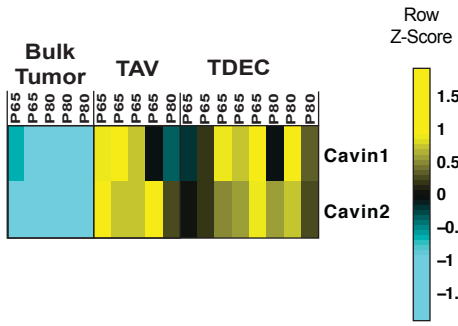**B**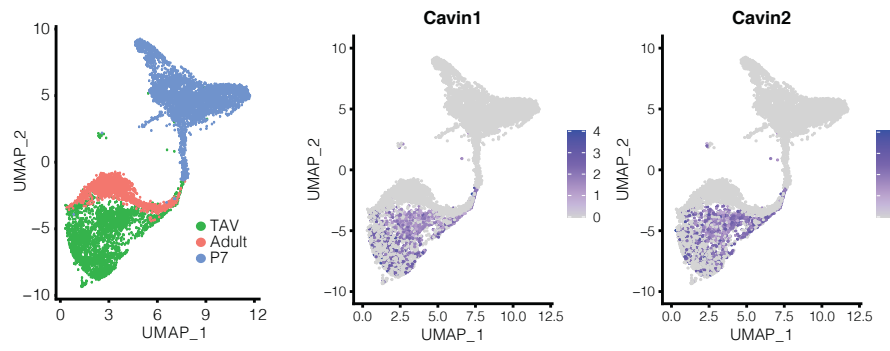**C**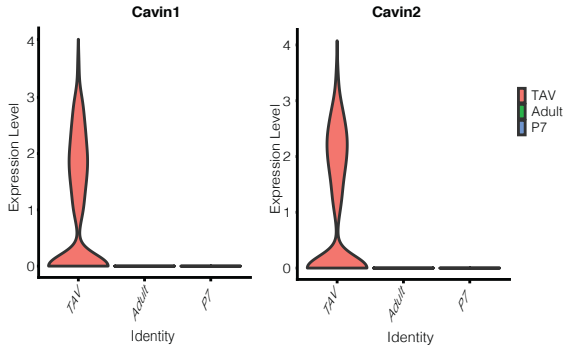**D**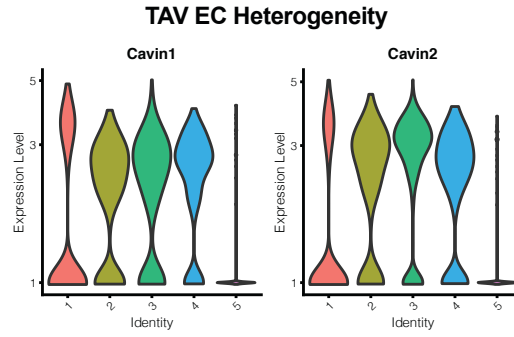

Supplement: noaa297_suppl_supplementary_figure_4.pdf [file noaa297_suppl_supplementary_figure_4.pdf]
